# Supplementary material for: Rapid temperature increases under isoflurane sedation
Source: Springer Nature journal article supplement (doi:10.1007/s00134-023-07090-z), 2023-05-09
Supplement: MOESM1 [file 25336334]

*Supplement:*

**Rapid temperature increases under isoflurane sedation**

Lukas M. Müller-Wirtz1,2 MD, Marius Graf1,Thomas Volk1,2 MD, Andreas Meiser1 MD

1) Department of Anaesthesiology, Intensive Care and Pain Therapy, Saarland University Medical Center and Saarland University Faculty of Medicine, 66421 Homburg, Saarland, Germany

2) **O**utcomes **R**esearch Consortium, Cleveland, OH 44195, USA

**Corresponding author:**

Lukas Martin Müller-Wirtz, MD

Department of Anaesthesiology, Intensive Care and Pain Therapy

Saarland University Medical Center and Saarland University Faculty of Medicine

66421 Homburg / Germany

Phone: +49 (0) 6841 16 22485

Email: lukas.mueller-wirtz@uks.eu

ORCID: 0000-0002-7984-1798

**Table S1:** Patient characteristics on all sedation days

|  | Isoflurane | Propofol | Standardized mean difference |
| --- | --- | --- | --- |
| Sedation days [n] | 257 | 468 | - |
| Age [years] | 53 ± 16 | 65 ± 14 | 0.791 |
| Sex [male/female] | 203 / 54 | 285 / 183 | 0.402 |
| Height [cm] | 175 ± 9 | 171 ± 9 | 0.477 |
| Weight [kg] | 94 ± 32 | 86 ± 27 | 0.268 |
| BMI [kg/m2] | 31 ± 11 | 29 ± 9 | 0.113 |
| Morphine equivalent  dose rates [µg/kg/h] | 85 ± 142 | 79 ± 191 | 0.038 |
| Length of sedation [days] | 7 ± 4 | 4 ± 3 | 0.770 |
| SAPS II | 36 ± 11 | 41 ± 12 | 0.428 |
| BMI, body mass index. SAPS II, Simplified Acute Physiology Score II on admission. Overall, 97 patients were included; 13 received isoflurane, 21 received propofol, and 63 received both sedatives sequentially on different sedation days. Eight patients of this study were also part of a large multicenter randomized trial [Meiser et al. Lancet Respir 2022 [5]]. | | | |

**Table S2:** Patient characteristics on fever days

|  | Isoflurane | Propofol | Standardized mean difference |
| --- | --- | --- | --- |
| Sedation days with fever [n] | 41 | 41 | - |
| Age [years] | 51 ± 14 | 64 ± 15 | 0.878 |
| Sex [male/female] | 39 / 2 | 26 / 15 | 0.839 |
| Height [cm] | 179 ± 6 | 172 ± 9 | 0.924 |
| Weight [kg] | 98 ± 24 | 87 ± 24 | 0.439 |
| BMI [kg/m2] | 30 ± 6 | 30 ± 7 | 0.135 |
| Morphine equivalent  dose rates [µg/kg/h] | 78 ± 130 | 30 ± 44 | 0.569 |
| Sedation day on which fever occurred [days] | 5 ± 3 | 4 ± 3 | 0.535 |
| SAPS II | 36 ± 8 | 36 ± 9 | 0.067 |
| SOFA | 11 ± 3 | 11 ± 2 | 0.135 |
| BMI, body mass index. SAPS II, Simplified Acute Physiology Score II on admission. SOFA, Sepsis-related Organ Failure Assessment score (collected daily). Of a total of 97 patients, 45 patients had episodes of fever (core temperatures ≥ 38.5°C). On days with fever, 16 patients received isoflurane and 29 received propofol. Electronic patient records were screened for the intake of fever-modulating medication (e.g., antipyretics) on fever days. One patient received a single dose of metamizole but only after the peak temperature of that day had already been reached. | | | |
